# Supplementary material
Source: PubMed Central journal article supplement (PMC6222111)
Supplement: supp_RA118.004554_138948_1_supp_197781_p8m5vx.pdf [file supp_RA118.004554_138948_1_supp_197781_p8m5vx.pdf]

## SUPPORTING INFORMATION

### **CRISPR delivery particles targeting *nuclear receptor-interacting protein 1 (Nrip1)* in adipose cells to enhance energy expenditure**

Yuefei Shen<sup>1</sup>, Jessica L. Cohen<sup>1</sup>, Sarah M. Nicoloro<sup>1</sup>, Mark Kelly<sup>1</sup>, Batuhan Yenilmez<sup>1</sup>, Felipe Henriques<sup>1</sup>, Emmanouela Tsagkaraki<sup>1,2</sup>, Yvonne J.K. Edwards<sup>1</sup>, Xiaodi Hu<sup>3</sup>, Randall H. Friedline<sup>3</sup>, Jason K. Kim<sup>1,3</sup> and Michael P. Czech<sup>1,\*</sup>

<sup>1</sup>Program in Molecular Medicine, University of Massachusetts Medical School, Worcester, Massachusetts 01605, United States.

<sup>2</sup>The Molecular Basis of Human Disease Graduate Program, University of Crete, School of Sciences, Faculty of Medicine, P.O. Box 2208, Heraklion, Crete 71003, Greece

<sup>3</sup>Division of Endocrinology, Metabolism, and Diabetes, Department of Medicine, University of Massachusetts Medical School, Worcester, MA 01605, USA.

\*Corresponding author. University of Massachusetts Medical School, 373 Plantation Street, Worcester, MA 01605, USA. Tel: 1 508 856 2254; Fax: 1 508 856 1617

E-mail address: [michael.czech@umassmed.edu](mailto:michael.czech@umassmed.edu)

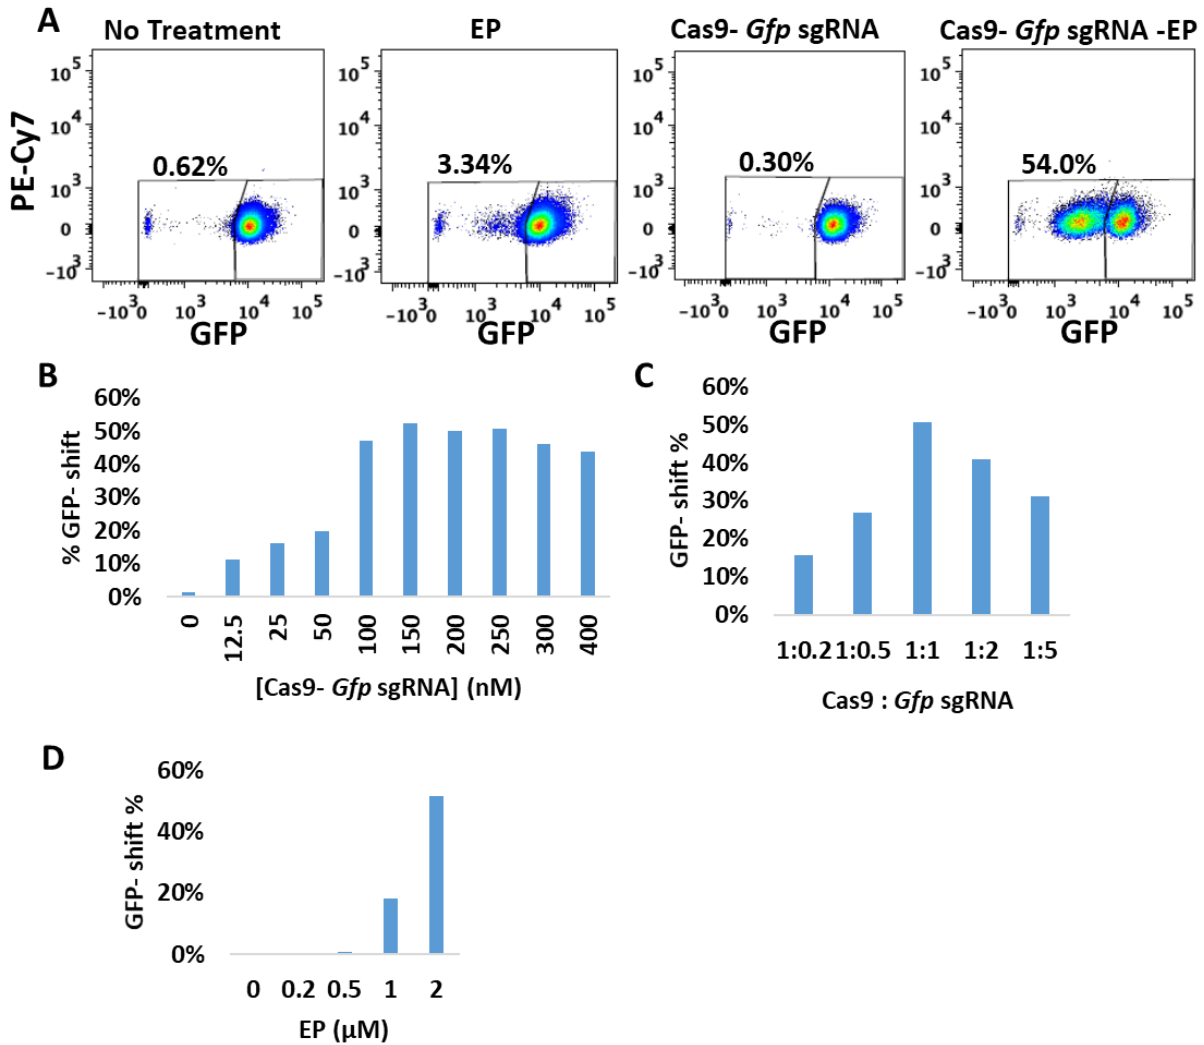

Figure S1. Efficient gene deletion was achieved with the treatment of CriPs targeting *Gfp* in GFP-J774A.1 cells. At 48 hours post treatment, flow cytometry was performed to measure the loss of GFP (A) Flow cytometry of GFP-J774A.1 cells treated with CriPs targeting *Gfp* (Cas9-*Gfp* sgRNA -EP) and controls (No treatment, EP and Cas9-*Gfp* sgRNA). Cas9: 150 nM, *Gfp* sgRNA: 150 nM, EP: 2  $\mu$ M. Figure S1A is the reuse of Figure 2A. (B) Different concentrations of Cas9-*Gfp* sgRNA (1:1) with 2  $\mu$ M of EP. (C) Different ratios of Cas9 (200 nM): *Gfp* sgRNA with 2  $\mu$ M of EP. (D) Different concentrations of EP with 200 nM of Cas9-*Gfp* sgRNA.

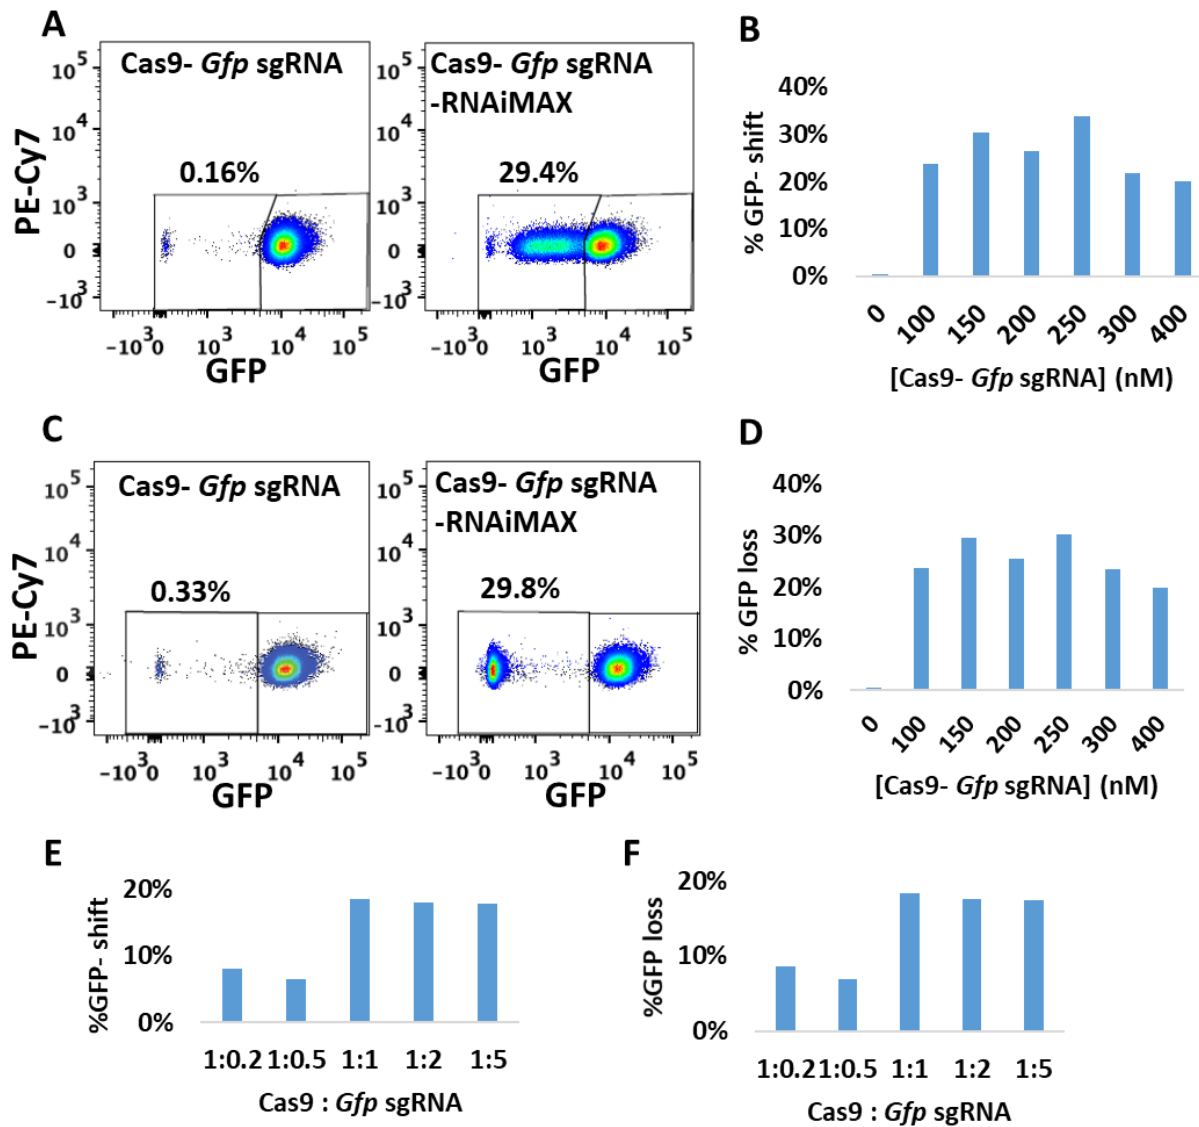

Figure S2. Flow cytometry of GFP-J774A.1 cells treated with RNAiMAX mediated delivery of Cas9- *Gfp* sgRNA. At 48 hours (A, B, E) or on 5 days (C, D, F) post treatment, flow cytometry was performed to measure the loss of GFP. (A, C) Flow cytometry measurements of GFP loss. Cas9: 150 nM, *Gfp* sgRNA: 150 nM, RNAiMAX: 3  $\mu$ l. Figure S2C is the reuse of Figure 2G. (B, D) Different concentrations of Cas9- *Gfp* sgRNA (1:1) with 3  $\mu$ l of RNAiMAX. (E, F) Different ratios of Cas9 : *Gfp* sgRNA with 3  $\mu$ l of RNAiMAX. Cas9: 200 nM

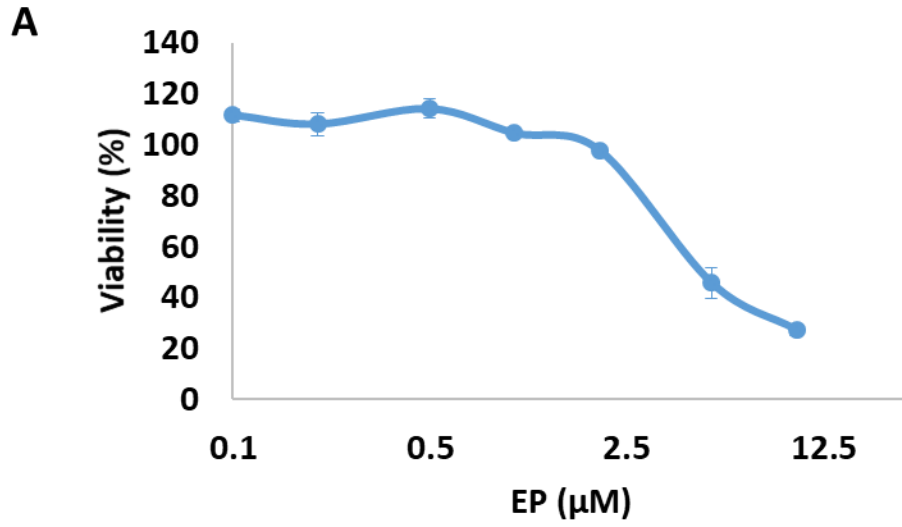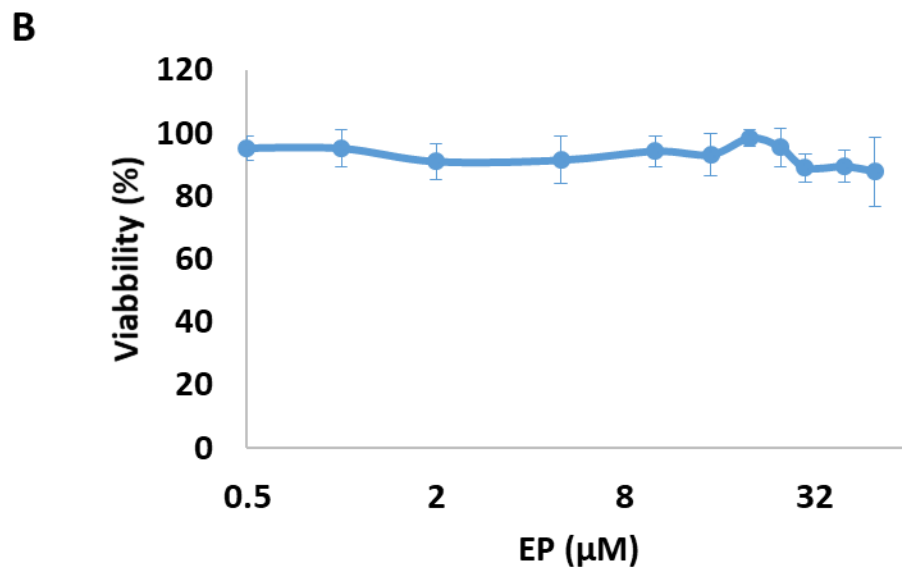

Figure S3. Cytotoxicity of CriPs with different concentrations of EP in GFP-J774A.1 cells and primary GFP pre-adipocytes. (A) GFP-J774A.1 cells (B) primary GFP pre-adipocytes. Cas9-sgRNA: 100 nM.

Table S1. sgRNA sequences

|                |                         |
|----------------|-------------------------|
| <i>Gfp</i>     | GGGCGAGGAGCTGTTCACCG    |
| <i>Nrip1</i> 1 | GGTTTGGAGTCACGTCAGGG    |
| <i>Nrip1</i> 2 | GGATTTAAGGTGCTATGGCG    |
| <i>Nrip1</i> 3 | GGAGTCGAAGAACATCTGCA    |
| <i>Nrip1</i> 4 | GGAGTACTGCAGGCATACGG    |
| Control        | GGGTTTCCTATAGAGGAGCAGCG |

Table S2. Primer sequences for T7E1 assay

|                                                                    |                      |
|--------------------------------------------------------------------|----------------------|
| <i>Gfp (for GFP-J774A.1)</i>                                       |                      |
| forward                                                            | GCCTCGATCCTCCCTTTATC |
| reverse                                                            | GAACTTCAGGGTCAGCTTGC |
| <i>Gfp (for GFP mice and primary cells isolated from GFP mice)</i> |                      |
| forward                                                            | GAGGGGAGGGATAAGTGAGG |
| reverse                                                            | GAACTTCAGGGTCAGCTTGC |
| <i>Nrip1 1</i>                                                     |                      |
| forward                                                            | TCTTTCGCTTGCCACCTGAT |
| reverse                                                            | AGCCTCAAGGAGCAGGGATA |
| <i>Nrip1 2</i>                                                     |                      |
| forward                                                            | CTCGCCCTTTTCTCCACCAT |
| reverse                                                            | CTAGGCTGCAGACTGTTGCT |
| <i>Nrip1 3</i>                                                     |                      |
| forward                                                            | TCCTGATGAAGCAACGACCC |
| reverse                                                            | GCCTTGTGACGACTTCCAGA |
| <i>Nrip1 4</i>                                                     |                      |
| forward                                                            | TCTCTTCAGCCGCATTGGTT |
| reverse                                                            | ATACAGCCAGCCAAGCAGAG |

Table S3. Sequences of *Nrip1* sgRNA 3 off-target sites

|              |                      |
|--------------|----------------------|
| Off-target 1 | GGACTATAAGAACATCTGCA |
| Off-target 2 | GGAGATGAAGAACATGTGCA |
| Off-target 3 | GGAGAAGAAGAACCTCTGCA |

Table S4. Primer sequences for *Nrip1* sgRNA 3 off-target sites

|              |                          |
|--------------|--------------------------|
| Off-target 1 |                          |
| forward      | TGTGGCTTGGCTGAATTTCT     |
| reverse      | ATGGCAGATCCACCTCACAG     |
| Off-target 2 |                          |
| forward      | GGAATTCCCAGAGGAACAATG    |
| reverse      | CACCTTCTCAGTGATCTCAGCA   |
| Off-target 3 |                          |
| forward      | GGAGCATCAGTAACTTCTTCCAAA |
| reverse      | GATAGTGGGATGGGCTACCTG    |
